# Supplementary material for: The roles of Na doping in BiCuSeO oxyselenides as a thermoelectric material
Source: Royal Society of Chemistry journal article supplement (doi:10.1039/c3ta14532h), 2014-01-01
Supplement: c3ta14532h1.pdf [file c3ta14532h1.pdf]

## Supporting Information

### Roles of Na doping in BiCuSeO oxyselenides

Jing Li,<sup>a,c</sup> Jiehe Sui,<sup>a,\*</sup> Yanling Pei,<sup>b</sup> Xianfu Meng,<sup>a</sup> David Berardan,<sup>c</sup> Nita Dragoe,<sup>c</sup> Wei Cai,<sup>a</sup> Li-Dong Zhao,<sup>c,\*</sup>

<sup>a</sup>*National Key Laboratory Precision Hot Processing of Metals, School of Materials Science and Engineering, Harbin Institute of Technology, Harbin 150001, China*

<sup>b</sup>*School of Materials Science and Engineering, Beihang University, Beijing 100191, China*

<sup>c</sup>*LEMHE, ICMMO (CNRS UMR 8182), Univ. Paris Sud, Orsay F91405, France*

*(L.-D. Zhao is presently in Department of Chemistry, Northwestern University, Evanston, Illinois 60208, USA.)*

Corresponding authors:

*E-mail: lidong-zhao@northwestern.edu, sui jiehe@hit.edu.cn*

## Experimental Details

Samples with the chemical composition  $\text{Bi}_{1-x}\text{Na}_x\text{CuSeO}$  ( $x=0, 0.005, 0.01, 0.015, 0.02$ ) were synthesized by a two-step solid state reaction route. All raw materials including  $\text{Na}_2\text{Se}$  are purchased from Alfa Aesar. A stoichiometric mixture of  $\text{Bi}_2\text{O}_3$  (4 N), Bi (3 N), Cu (3 N), Se (5 N) and  $\text{Na}_2\text{Se}$  (3 N) powders was mixed by hand in mortar and pressed into bars which were then sealed in silica tubes, under vacuum, and heated at 573 K for 15 h. The obtained materials were crushed into powders, and then cold pressed into bars and heated again at 973 K for another 15 h in sealed silica tubes. After that, obtained columns were ground into powders, the obtained powders were densified by a spark plasma sintering system (Sumimoto SPS1050, Japan) under an axial compressive stress of 50 MPa in vacuum at 973 K for 6 min, resulting in a disk-shaped sample of  $\text{Ø } 15 \times 10$  mm. The obtained SPS processed pellets were cut along the radial direction of the disk sample into bars with dimensions of about 12 mm  $\times$  3 mm  $\times$  3 mm that were used for simultaneous measurement of the Seebeck coefficient and the electrical conductivity using an Ulvac Riko ZEM-3 instrument (ZEM-3, ULVAC-RIKO, Japan) under a helium atmosphere from room temperature to 923 K. The thermal conductivity was calculated from  $\kappa = DC_p\rho$ , where the thermal diffusivity (D) was measured using the laser flash diffusivity method in a Netzsch LFA427 (NETZSCH, LFA427, Germany), the thermal diffusivity data were analyzed using a Cowan model with pulse correction and heating and cooling cycles gave reproducible values for each sample. The specific heat capacity ( $C_p$ ) was determined by differential scanning calorimetry (NETZSCH DSC 404C Germany). The density ( $\rho$ ) was determined by using the dimensions and mass of the sample, which was then reconfirmed using the Archimedes method. The Hall coefficients,  $R_H$ , of the samples were measured at room temperature using a Hall effect measurement system (SWIN,

Hall8800, Taiwan China), and a magnetic field of 0.5T was applied. The carrier concentration ( $n_H$ ) was calculated by  $n_H=1/eR_H$ , where  $e$  is the electronic charge. The carrier mobility ( $\mu$ ) was calculated by  $\mu=\sigma R_H$ , where  $\sigma$  is the electrical resistivity.

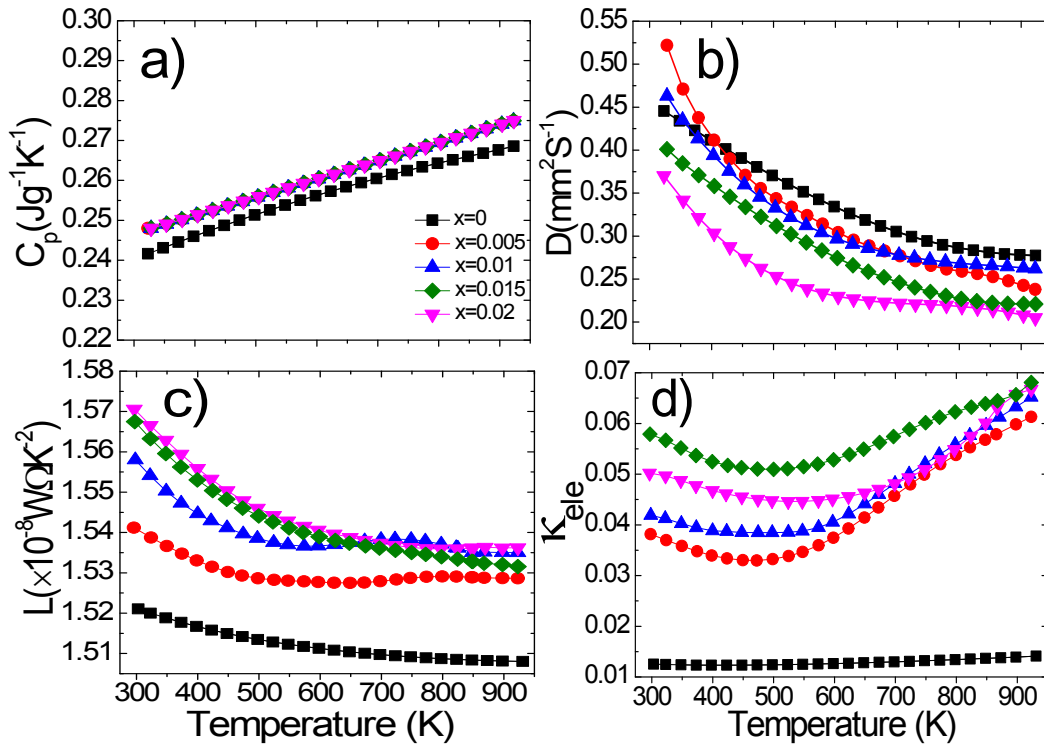

**Figure S1:** Thermoelectric properties as a function of temperature for Bi<sub>1-x</sub>Na<sub>x</sub>CuSeO samples: (a) Heat capacity; (b) Thermal diffusivity; (c) Lorenz number; (d) Electronic thermal conductivity
